# Supplementary material for: Improved precision of QTL mapping using a nonlinear Bayesian method in a multi-breed population leads to greater accuracy of across-breed genomic predictions
Source: PubMed Central journal article supplement (PMC4399226; doi:10.1186/s12711-014-0074-4), 2015-04-17
Supplement: 12711_2014_74_MOESM1_ESM.pdf [file 12711_2014_74_MOESM1_ESM.pdf]

## Additional file 1

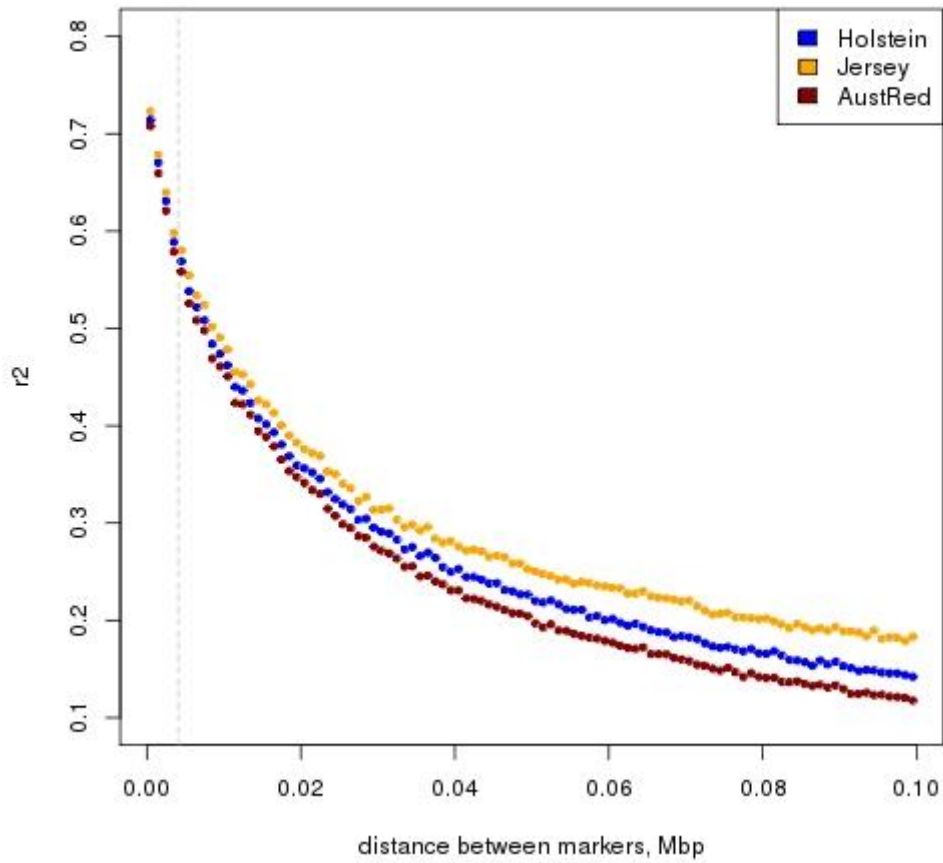

**Figure S1 Linkage disequilibrium in Holstein, Jersey and Australian Red dairy cattle**

Shown is the average  $r^2$  (correlation) between SNP pairs and the average distance between adjacent SNP (vertical grey line) on BTA1.

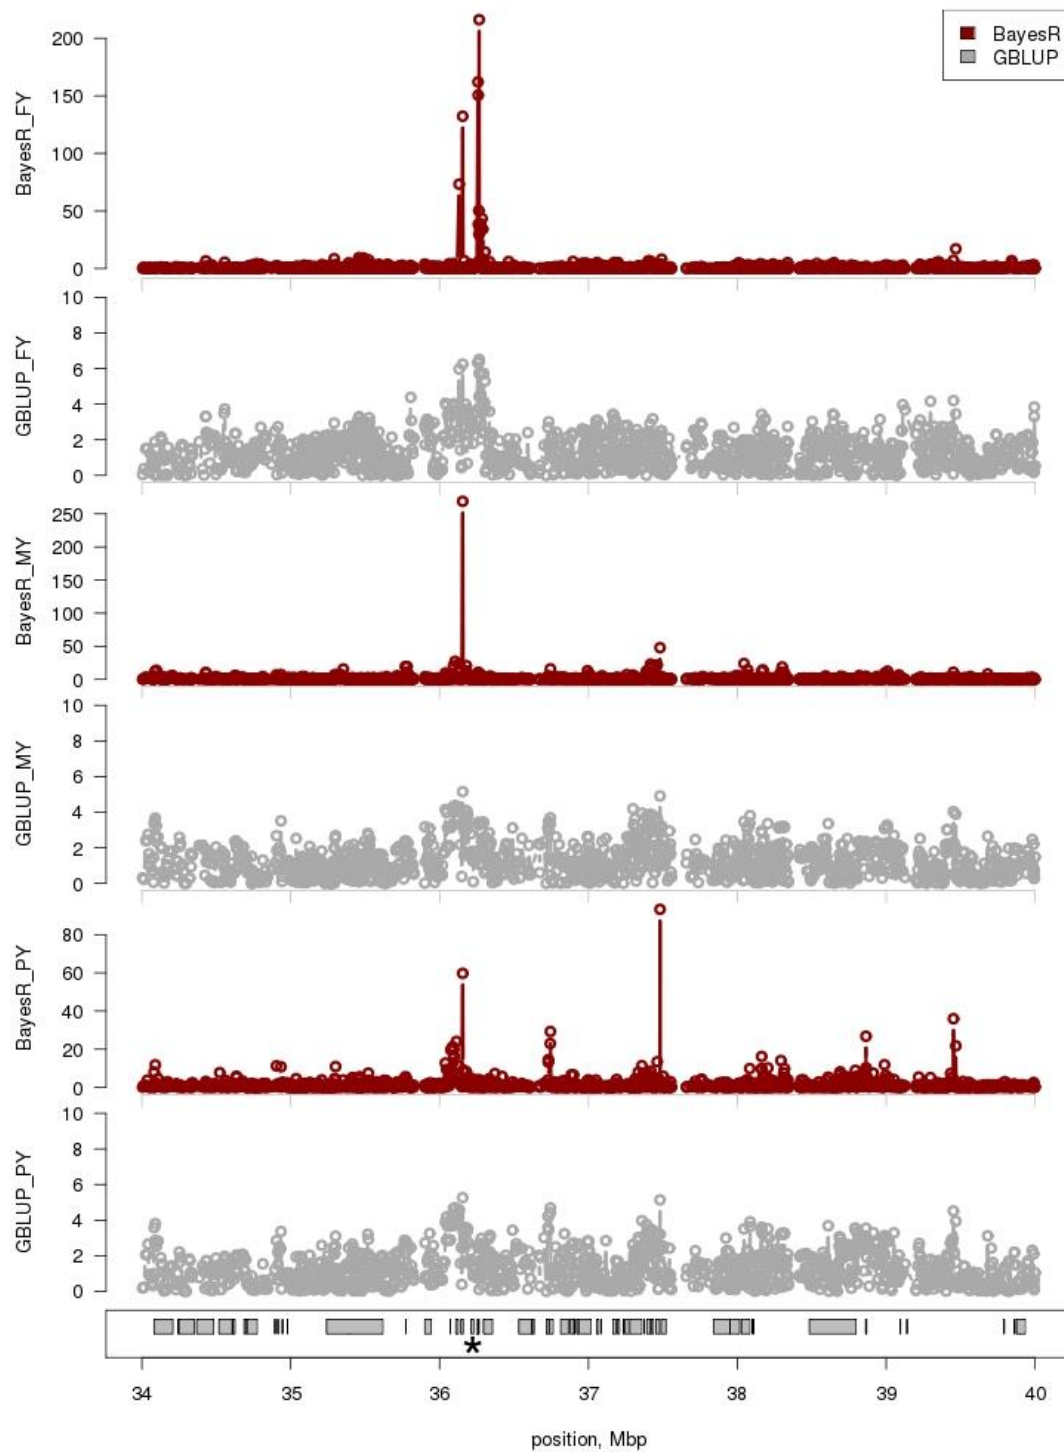

**Figure S2 SNP effects estimated by BayesR and GBLUP for FY, MY and PY near AGPAT6**

Shown is the (mean corrected) absolute SNP effect for Holstein and Jersey animals from the bull and cow, multi-breed reference population. Traits are FY = fat yield, MY = milk yield and PY = protein yield. The position of AGPAT6 on BTA27 is marked (\*). Note the changed y-axis scale for each graph.

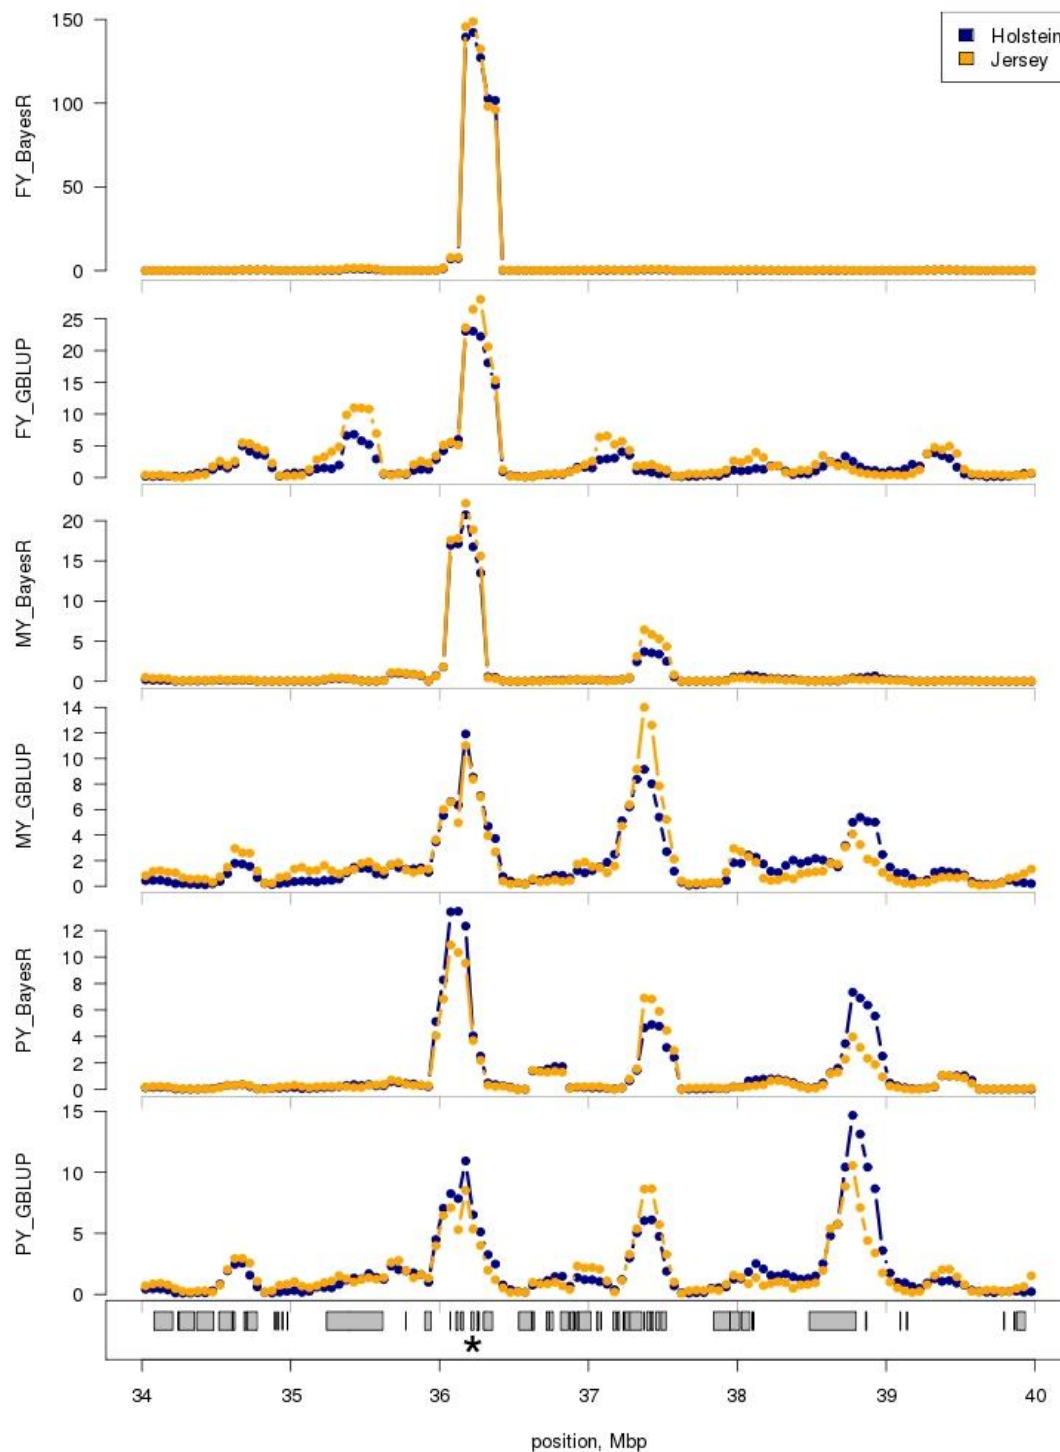

**Figure S3 Local GEBV variance near AGPAT6 for FY, MY and PY using BayesR and GBLUP**

Shown is the (mean corrected) GEBV variance in 250kb windows for Holstein and Jersey animals from the bull and cow, multi-breed reference population. Traits are FY = fat yield, MY = milk yield and PY = protein yield. The position of AGPAT6 on BTA27 is marked (\*). Note the changed y-axis scale for each graph

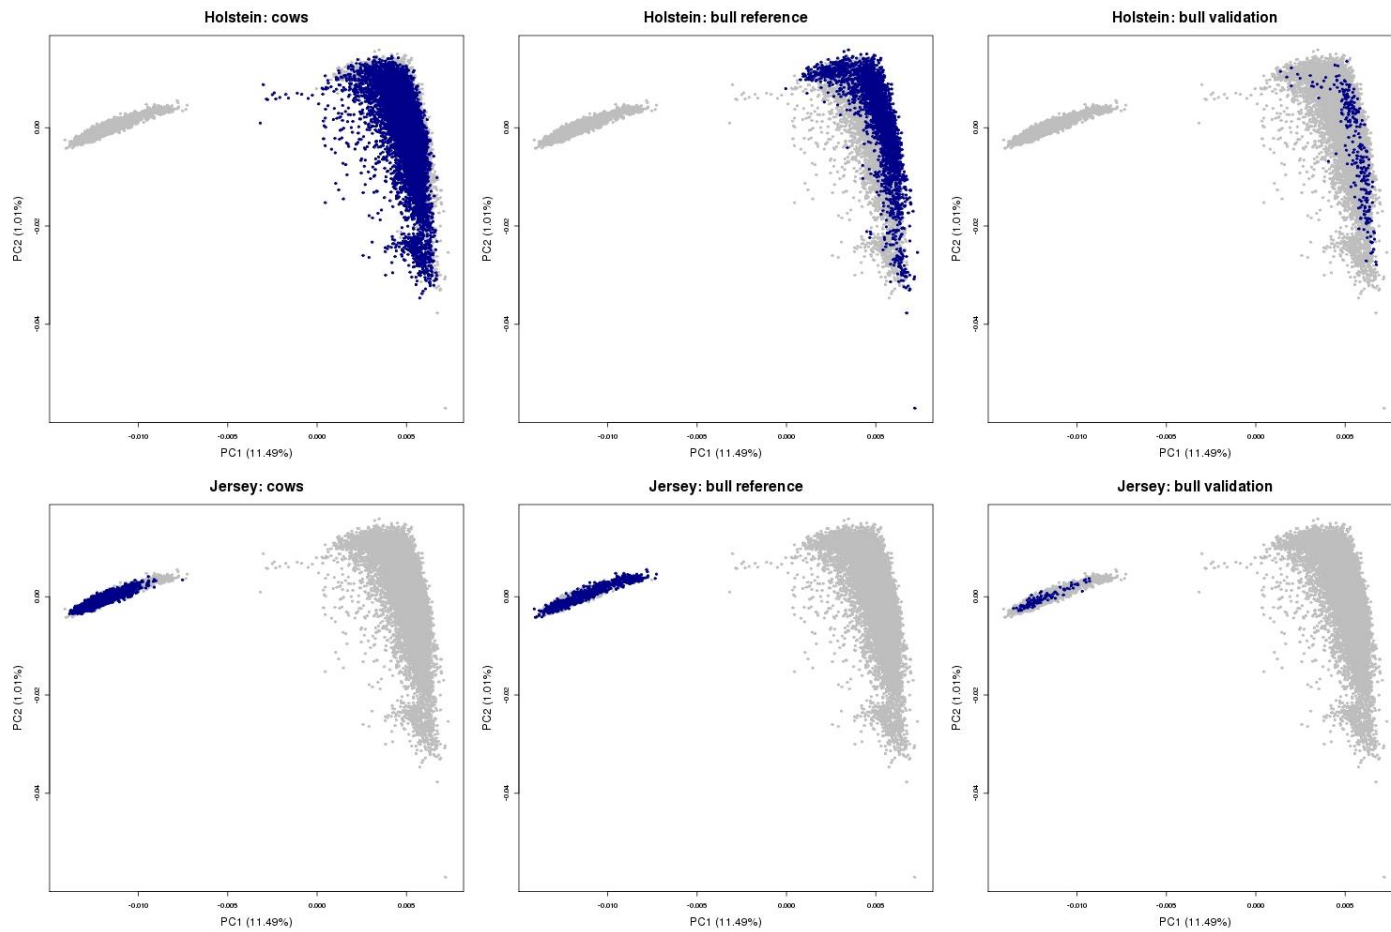

**Figure S4 Relationship between Holstein and Jersey cows and bulls in the reference and validation datasets**

Principle components from the G matrix using the `eigen()` function in R [51]. The named subset (i.e. Holstein cows, top left) is highlighted in blue for each panel.
