# Supplementary material for: Improved precision of QTL mapping using a nonlinear Bayesian method in a multi-breed population leads to greater accuracy of across-breed genomic predictions
Source: Genet Sel Evol. 2015 Apr 17;47(1):29. doi: 10.1186/s12711-014-0074-4 (PMC4399226; doi:10.1186/s12711-014-0074-4)
Supplement: Additional file 3: — Effect of reference dataset, prediction method and polygenic term on genomic predictions of milk traits, stature, fertility and survival. Table S1. Bold characters show the prediction accuracies (Acc.) and biases using only pedigree information or GBLUP with bull only or bull and cow reference datasets. Below the numbers in bold characters are the average effect on the prediction when changing of the method used to predict SNP effects (+BayesR), adding non-target breed animals to the reference (i.e. multi-breed reference, e.g. +Holstein) and adding the polygenic effect (+polygenic). These estimates are from the linear model fitted to the prediction results and effects are deviations from the GBLUP predictions. Table S2. Genomic prediction accuracy and bias for the Holstein validation dataset. Genomic predictions accuracy and bias for the Holstein validation population using different combinations of reference datasets (bulls or bulls and cows), method of prediction (GBLUP or BayesR), breed composition in the reference population (single or both breeds), and with or without inclusion of the polygenic term in the prediction. Table S3. Genomic prediction accuracy and bias for the Jersey validation dataset. Genomic predictions accuracy and bias for the Jersey validation population using different combinations of reference datasets (bulls or bulls and cows), method of prediction (GBLUP or BayesR), breed composition in the reference population (single or both breeds), and with or without inclusion of the polygenic term in the prediction. Table S4. Across-breed prediction accuracies for Australian Red animals. Prediction accuracies and bias for genomic predictions in Australian Red animals are provided separately for the bull and cow validation sets. Table S5. Details on the genes identified from the mammary expression data and listed in Table 6 . Tables S5 gives the Ensebl gene ID, full name, chromosome, gene start and end on the bovine genome (bp) and the description of [file 12711_2014_74_MOESM3_ESM.xlsx]

## Sheet: Table S1
	Table S1. Effect of reference dataset, prediction method and polygenic term on genomic predictions of milk traits, stature, fertility and survival
			FY		MY		PY		F%		P%		Average			STAT		FERT		SURV
			Acc.	Bias	Acc.	Bias	Acc.	Bias	Acc.	Bias	Acc.	Bias	Acc.	Bias		Acc.	Bias	Acc.	Bias	Acc.	Bias
	Prediction of Holstein
		bullsNcows, pedigree	0.48	0.85	0.5	0.79	0.55	0.85	0.48	0.85	0.6	0.85	0.52	0.84		0.45	0.85	0.36	1.32	0.24	0.9
		bullsOnly, GBLUP	0.53	1.15	0.53	0.95	0.58	1.13	0.63	1.09	0.78	1.03	0.61	1.07		0.48	0.94	0.44	1.18	0.33	1.05
		+BayesR	0.08	0.1	0.05	-0.01	0.01	-0.05	0.16	0.03	0	0.06	0.06	0.03		0.01	0.01	0.01	0.02	0	-0.04
		+Jersey bullsOnly*	0.00	0	0	0	0	-0.02	0	-0.02	-0.02	-0.03	-0.01	-0.01		0	0	0	0.07	0	0
		+polygenic	0.01	-0.2	0.04	-0.11	0.03	-0.18	0	-0.12	0.02	-0.12	0.02	-0.15		0.01	-0.13	0	-0.1	0	-0.17
		bullsNcows, GBLUP	0.6	1.18	0.59	0.9	0.58	1.06	0.72	0.93	0.82	1.02	0.66	1.02		0.52	0.85	0.44	1.38	0.33	1.17
		+BayesR	0.04	0.05	0.03	-0.02	-0.01	-0.05	0.09	0.06	0.01	-0.01	0.03	0.01		0.02	0.01	0	-0.02	0	0
		+Jersey bullsNcows	0.01	0.01	0.01	0	0	-0.01	0	-0.01	0	-0.01	0	0		0	-0.03	0.01	0.05	-0.01	-0.07
		+polygenic	0.02	-0.25	0.06	-0.09	0.08	-0.15	0.01	-0.07	0.01	-0.11	0.03	-0.13		0	-0.03	0	-0.01	0	-0.1
	Prediction of Jersey
		bullsNcows, pedigree*	0.52	0.71	0.53	0.78	0.56	0.75	0.6	0.85	0.63	0.84	0.57	0.79		0.34	0.88	0.23	1.58	0.12	0.48
		bullsOnly, GBLUP	0.57	0.85	0.59	1.05	0.65	1.09	0.54	0.86	0.74	1.04	0.62	0.98		0.33	1.01	0.14	1.09	0.14	0.65
		+BayesR	0.01	0.01	0.06	0.01	0.03	0.02	0.17	0.1	0	0.01	0.05	0.03		0	-0.04	0	-0.05	0	-0.01
		+Holstein bullsOnly*	0.01	0.05	-0.01	-0.01	0.01	0.05	-0.01	-0.01	-0.02	0.02	0	0.02		0.04	0.06	-0.12	-0.87	-0.01	0.01
		+polygenic	0	-0.08	0	-0.12	-0.01	-0.18	0.01	-0.07	0.02	-0.05	0.01	-0.1		0	-0.09	0.01	-0.02	0.03	0.06
		bullsNcows, GBLUP	0.56	0.88	0.62	0.93	0.67	1.19	0.64	0.81	0.76	0.9	0.65	0.94		0.42	1	0.25	1.46	0.05	0.29
		+BayesR	0	0.02	0.07	0.05	0.04	0.04	0.12	0.09	0.03	0	0.05	0.04		-0.02	-0.09	0.02	0.17	0.01	0.06
		+Holstein bullsNcows	0.01	0.02	0.01	-0.01	0.01	-0.02	0.01	0.02	0.01	-0.01	0.01	0		0.02	-0.01	-0.02	-0.49	0	0.02
		+polygenic	0.02	-0.19	0	-0.14	-0.01	-0.33	0.02	-0.08	0.02	-0.08	0.01	-0.17		0.01	-0.06	0	-0.05	0.05	0.17
	Shown in bold are the prediction accuracies (Acc.) and bias using only pedigree information or GBLUP with bull only or bull and cow reference datasets. Below the bolded numbers is the average effect of the method used to predict SNP effects (+BayesR), the effect of adding non-target breed animals to the reference (i.e. multi-breed reference, e.g. +Holstein) and adding the polygenic effect (+polyg…
	Traits are: FY = fat yield (kg/lactation), MY = milk yield (L/lactation), PY = protein yield (kg/lactation), F% = fat percentage (%), P% = protein percentage in milk (%), STAT = stature, FERT = fertility (calving interval, days) and SURV = survival (annual probability).
	*Due to singularities, predictions of F% in Jerseys using the pedigree were made using an unweighted analysis, and GBLUP predictions for P% in the Jersey and multi-breed (Holstein-Jersey) bullsOnly analyses were made using a weighted analysis and only fitting the GRM.

## Sheet: Table S2
	Table S2. Genomic prediction accuracy and bias for the Holstein validation dataset												Key to Table S2 & Table S3
													Column heading	Labels	Definition
	method	breed	refSet	valSet	trait	type	G	G+A
	GBLUP_AFwt	H	bullsOnly	valH	1	cor	0.459264	0.459264					method	GBLUP_AFwt	GBLUP with weights, fitting pedigree relationship matrix & fixed effects
	GBLUP_AFwt	H	bullsOnly	valH	1	reg	0.836642	0.836642					method	GBLUP_AF	GBLUP, fitting pedigree relationship matrix & fixed effects
	GBLUP_AFwt	H	bullsNcows	valH	1	cor	0.477695	0.477695					method	GBLUP_GAFwt	GBLUP with weights, fitting GRM, pedigree relationship matrix & fixed effects
	GBLUP_AFwt	H	bullsNcows	valH	1	reg	0.848723	0.848723					method	GBLUP_GFwt	GBLUP with weights, fitting GRM & fixed effects
	GBLUP_AFwt	H	bullsOnly	valH	2	cor	0.489162	0.489162					method	BayesRwt	BayesR analysis with weights
	GBLUP_AFwt	H	bullsOnly	valH	2	reg	0.798614	0.798614					breed	H	Holstein (only)
	GBLUP_AFwt	H	bullsNcows	valH	2	cor	0.502028	0.502028					breed	J	Jersey (only)
	GBLUP_AFwt	H	bullsNcows	valH	2	reg	0.792518	0.792518					breed	HJ	Holstein and Jersey
	GBLUP_AFwt	H	bullsOnly	valH	3	cor	0.546677	0.546677					refset	bullsOnly	bulls (only)
	GBLUP_AFwt	H	bullsOnly	valH	3	reg	0.858181	0.858181					refset	bullsNcows	bulls and cows
	GBLUP_AFwt	H	bullsNcows	valH	3	cor	0.554864	0.554864					valset	valH	validation in Holstein animals
	GBLUP_AFwt	H	bullsNcows	valH	3	reg	0.845173	0.845173					valset	valJ	validation in Jersey animals
	GBLUP_AFwt	H	bullsOnly	valH	22	cor	0.44935	0.44935					trait	1	fat yield
	GBLUP_AFwt	H	bullsOnly	valH	22	reg	0.817622	0.817622					trait	2	milk yield
	GBLUP_AFwt	H	bullsNcows	valH	22	cor	0.450012	0.450012					trait	3	protein yield
	GBLUP_AFwt	H	bullsNcows	valH	22	reg	0.84805	0.84805					trait	22	stature
	GBLUP_AFwt	H	bullsOnly	valH	31	cor	0.3727	0.3727					trait	31	fertility (calving interval)
	GBLUP_AFwt	H	bullsOnly	valH	31	reg	1.085	1.085					trait	32	survival
	GBLUP_AFwt	H	bullsNcows	valH	31	cor	0.361164	0.361164					trait	34	fat% in milk
	GBLUP_AFwt	H	bullsNcows	valH	31	reg	1.31592	1.31592					trait	35	protein% in milk
	GBLUP_AFwt	H	bullsOnly	valH	32	cor	0.257045	0.257045					type	cor	correlation
	GBLUP_AFwt	H	bullsOnly	valH	32	reg	0.798156	0.798156					type	reg	regression
	GBLUP_AFwt	H	bullsNcows	valH	32	cor	0.243227	0.243227
	GBLUP_AFwt	H	bullsNcows	valH	32	reg	0.898805	0.898805					where column heading are defined as:
	GBLUP_AFwt	H	bullsOnly	valH	34	cor	0.4473	0.4473					method = method used for prediction
	GBLUP_AFwt	H	bullsOnly	valH	34	reg	0.803807	0.803807					breed = breed composition of reference dataset
	GBLUP_AFwt	H	bullsNcows	valH	34	cor	0.477401	0.477401					refset = gender composition of reference dataset (bulls only or bulls and cows)
	GBLUP_AFwt	H	bullsNcows	valH	34	reg	0.844954	0.844954					valset = validation dataset where accuracy and bias calculations are made
	GBLUP_AF	H	bullsOnly	valH	35	cor	0.585281	0.585281					trait = trait analysed
	GBLUP_AF	H	bullsOnly	valH	35	reg	0.874222	0.874222					type = either calculation of the correlation (accuracy) or regression (bias)
	GBLUP_AFwt	H	bullsNcows	valH	35	cor	0.599471	0.599471					G = predictions for the validation dataset using GEBV only
	GBLUP_AFwt	H	bullsNcows	valH	35	reg	0.84758	0.84758					G + A = predictions for the validation using GEBV and pedigree predictions
	GBLUP_GAFwt	H	bullsOnly	valH	1	cor	0.525527	0.53729
	GBLUP_GAFwt	H	bullsOnly	valH	1	reg	1.14552	0.943233
	GBLUP_GAFwt	H	bullsNcows	valH	1	cor	0.597956	0.613495
	GBLUP_GAFwt	H	bullsNcows	valH	1	reg	1.17765	0.935983
	GBLUP_GAFwt	H	bullsOnly	valH	2	cor	0.527758	0.575451
	GBLUP_GAFwt	H	bullsOnly	valH	2	reg	0.94524	0.845357
	GBLUP_GAFwt	H	bullsNcows	valH	2	cor	0.584809	0.65234
	GBLUP_GAFwt	H	bullsNcows	valH	2	reg	0.890768	0.824064
	GBLUP_GAFwt	H	bullsOnly	valH	3	cor	0.581788	0.612422
	GBLUP_GAFwt	H	bullsOnly	valH	3	reg	1.11513	0.946138
	GBLUP_GAFwt	H	bullsNcows	valH	3	cor	0.58534	0.661946
	GBLUP_GAFwt	H	bullsNcows	valH	3	reg	1.06041	0.91095
	GBLUP_GAFwt	H	bullsOnly	valH	22	cor	0.482138	0.488614
	GBLUP_GAFwt	H	bullsOnly	valH	22	reg	0.938622	0.802972
	GBLUP_GAFwt	H	bullsNcows	valH	22	cor	0.523288	0.523601
	GBLUP_GAFwt	H	bullsNcows	valH	22	reg	0.8346	0.823697
	GBLUP_GAFwt	H	bullsOnly	valH	31	cor	0.437234	0.437779
	GBLUP_GAFwt	H	bullsOnly	valH	31	reg	1.17169	1.112
	GBLUP_GAFwt	H	bullsNcows	valH	31	cor	0.437872	0.437873
	GBLUP_GAFwt	H	bullsNcows	valH	31	reg	1.35368	1.35367
	GBLUP_GAFwt	H	bullsOnly	valH	32	cor	0.325025	0.323065
	GBLUP_GAFwt	H	bullsOnly	valH	32	reg	1.04656	0.87604
	GBLUP_GAFwt	H	bullsNcows	valH	32	cor	0.328699	0.325716
	GBLUP_GAFwt	H	bullsNcows	valH	32	reg	1.13173	1.03474
	GBLUP_GAFwt	H	bullsOnly	valH	34	cor	0.622395	0.629409
	GBLUP_GAFwt	H	bullsOnly	valH	34	reg	1.09716	0.960647
	GBLUP_GAFwt	H	bullsNcows	valH	34	cor	0.713474	0.723935
	GBLUP_GAFwt	H	bullsNcows	valH	34	reg	0.911297	0.862191
	GBLUP_GAFwt	H	bullsOnly	valH	35	cor	0.767916	0.770869
	GBLUP_GAFwt	H	bullsOnly	valH	35	reg	1.03994	0.948173
	GBLUP_GAFwt	H	bullsNcows	valH	35	cor	0.825138	0.827673
	GBLUP_GAFwt	H	bullsNcows	valH	35	reg	1.01327	0.91576
	BayesRwt	H	bullsOnly	valH	1	cor	0.60579	0.622669
	BayesRwt	H	bullsOnly	valH	1	reg	1.24359	1.05154
	BayesRwt	H	bullsNcows	valH	1	cor	0.631345	0.65657
	BayesRwt	H	bullsNcows	valH	1	reg	1.22419	0.984045
	BayesRwt	H	bullsOnly	valH	2	cor	0.59218	0.628918
	BayesRwt	H	bullsOnly	valH	2	reg	0.947415	0.832137
	BayesRwt	H	bullsNcows	valH	2	cor	0.615455	0.681914
	BayesRwt	H	bullsNcows	valH	2	reg	0.886335	0.792577
	BayesRwt	H	bullsOnly	valH	3	cor	0.59451	0.623633
	BayesRwt	H	bullsOnly	valH	3	reg	1.09187	0.901475
	BayesRwt	H	bullsNcows	valH	3	cor	0.576336	0.659084
	BayesRwt	H	bullsNcows	valH	3	reg	1.01578	0.861094
	BayesRwt	H	bullsOnly	valH	22	cor	0.490195	0.49713
	BayesRwt	H	bullsOnly	valH	22	reg	0.958503	0.815969
	BayesRwt	H	bullsNcows	valH	22	cor	0.536748	0.537171
	BayesRwt	H	bullsNcows	valH	22	reg	0.866856	0.833787
	BayesRwt	H	bullsOnly	valH	31	cor	0.448501	0.449729
	BayesRwt	H	bullsOnly	valH	31	reg	1.19189	1.10887
	BayesRwt	H	bullsNcows	valH	31	cor	0.433983	0.433983
	BayesRwt	H	bullsNcows	valH	31	reg	1.36822	1.36822
	BayesRwt	H	bullsOnly	valH	32	cor	0.323442	0.320164
	BayesRwt	H	bullsOnly	valH	32	reg	1.0203	0.844222
	BayesRwt	H	bullsNcows	valH	32	cor	0.331857	0.331857
	BayesRwt	H	bullsNcows	valH	32	reg	1.14752	1.14752
	BayesRwt	H	bullsOnly	valH	34	cor	0.790582	0.791418
	BayesRwt	H	bullsOnly	valH	34	reg	1.11584	1.00603
	BayesRwt	H	bullsNcows	valH	34	cor	0.813727	0.81686
	BayesRwt	H	bullsNcows	valH	34	reg	1.00607	0.914726
	BayesRwt	H	bullsOnly	valH	35	cor	0.797298	0.808047
	BayesRwt	H	bullsOnly	valH	35	reg	1.08795	0.928209
	BayesRwt	H	bullsNcows	valH	35	cor	0.833136	0.849203
	BayesRwt	H	bullsNcows	valH	35	reg	1.01955	0.89841
	GBLUP_AFwt	HJ	bullsOnly	valH	1	cor	0.458936	0.458936
	GBLUP_AFwt	HJ	bullsOnly	valH	1	reg	0.831713	0.831713
	GBLUP_AFwt	HJ	bullsNcows	valH	1	cor	0.477822	0.477822
	GBLUP_AFwt	HJ	bullsNcows	valH	1	reg	0.84671	0.84671
	GBLUP_AFwt	HJ	bullsOnly	valH	2	cor	0.487526	0.487526
	GBLUP_AFwt	HJ	bullsOnly	valH	2	reg	0.792069	0.792069
	GBLUP_AFwt	HJ	bullsNcows	valH	2	cor	0.50207	0.50207
	GBLUP_AFwt	HJ	bullsNcows	valH	2	reg	0.791296	0.791296
	GBLUP_AFwt	HJ	bullsOnly	valH	3	cor	0.545674	0.545674
	GBLUP_AFwt	HJ	bullsOnly	valH	3	reg	0.85483	0.85483
	GBLUP_AFwt	HJ	bullsNcows	valH	3	cor	0.554623	0.554623
	GBLUP_AFwt	HJ	bullsNcows	valH	3	reg	0.843538	0.843538
	GBLUP_AFwt	HJ	bullsOnly	valH	22	cor	0.449364	0.449364
	GBLUP_AFwt	HJ	bullsOnly	valH	22	reg	0.823304	0.823304
	GBLUP_AFwt	HJ	bullsNcows	valH	22	cor	0.4488	0.4488
	GBLUP_AFwt	HJ	bullsNcows	valH	22	reg	0.833619	0.833619
	GBLUP_AFwt	HJ	bullsOnly	valH	31	cor	0.372976	0.372976
	GBLUP_AFwt	HJ	bullsOnly	valH	31	reg	1.12522	1.12522
	GBLUP_AFwt	HJ	bullsNcows	valH	31	cor	0.358156	0.358156
	GBLUP_AFwt	HJ	bullsNcows	valH	31	reg	1.36998	1.36998
	GBLUP_AFwt	HJ	bullsOnly	valH	32	cor	0.257072	0.257072
	GBLUP_AFwt	HJ	bullsOnly	valH	32	reg	0.79802	0.79802
	GBLUP_AFwt	HJ	bullsNcows	valH	32	cor	0.244876	0.244876
	GBLUP_AFwt	HJ	bullsNcows	valH	32	reg	0.876372	0.876372
	GBLUP_AFwt	HJ	bullsOnly	valH	34	cor	0.447073	0.447073
	GBLUP_AFwt	HJ	bullsOnly	valH	34	reg	0.802019	0.802019
	GBLUP_AFwt	HJ	bullsNcows	valH	34	cor	0.478371	0.478371
	GBLUP_AFwt	HJ	bullsNcows	valH	34	reg	0.843108	0.843108
	GBLUP_AF	HJ	bullsOnly	valH	35	cor	0.584764	0.584764
	GBLUP_AF	HJ	bullsOnly	valH	35	reg	0.864036	0.864036
	GBLUP_AFwt	HJ	bullsNcows	valH	35	cor	0.599226	0.599226
	GBLUP_AFwt	HJ	bullsNcows	valH	35	reg	0.847792	0.847792
	GBLUP_GAFwt	HJ	bullsOnly	valH	1	cor	0.53536	0.545558
	GBLUP_GAFwt	HJ	bullsOnly	valH	1	reg	1.15323	0.946707
	GBLUP_GAFwt	HJ	bullsNcows	valH	1	cor	0.60992	0.623164
	GBLUP_GAFwt	HJ	bullsNcows	valH	1	reg	1.19927	0.943243
	GBLUP_GAFwt	HJ	bullsOnly	valH	2	cor	0.532253	0.579523
	GBLUP_GAFwt	HJ	bullsOnly	valH	2	reg	0.952236	0.84099
	GBLUP_GAFwt	HJ	bullsNcows	valH	2	cor	0.594321	0.658086
	GBLUP_GAFwt	HJ	bullsNcows	valH	2	reg	0.895042	0.817502
	GBLUP_GAFwt	HJ	bullsOnly	valH	3	cor	0.582257	0.612048
	GBLUP_GAFwt	HJ	bullsOnly	valH	3	reg	1.11611	0.938305
	GBLUP_GAFwt	HJ	bullsNcows	valH	3	cor	0.586622	0.66275
	GBLUP_GAFwt	HJ	bullsNcows	valH	3	reg	1.05162	0.90078
	GBLUP_GAFwt	HJ	bullsOnly	valH	22	cor	0.487797	0.492239
	GBLUP_GAFwt	HJ	bullsOnly	valH	22	reg	0.929112	0.810626
	GBLUP_GAFwt	HJ	bullsNcows	valH	22	cor	0.51991	0.522169
	GBLUP_GAFwt	HJ	bullsNcows	valH	22	reg	0.827221	0.802606
	GBLUP_GAFwt	HJ	bullsOnly	valH	31	cor	0.439024	0.439542
	GBLUP_GAFwt	HJ	bullsOnly	valH	31	reg	1.22742	1.16963
	GBLUP_GAFwt	HJ	bullsNcows	valH	31	cor	0.442413	0.442415
	GBLUP_GAFwt	HJ	bullsNcows	valH	31	reg	1.44599	1.44598
	GBLUP_GAFwt	HJ	bullsOnly	valH	32	cor	0.325504	0.323395
	GBLUP_GAFwt	HJ	bullsOnly	valH	32	reg	1.06283	0.881445
	GBLUP_GAFwt	HJ	bullsNcows	valH	32	cor	0.3277	0.324153
	GBLUP_GAFwt	HJ	bullsNcows	valH	32	reg	1.1554	1.00893
	GBLUP_GAFwt	HJ	bullsOnly	valH	34	cor	0.624184	0.630192
	GBLUP_GAFwt	HJ	bullsOnly	valH	34	reg	1.08202	0.935824
	GBLUP_GAFwt	HJ	bullsNcows	valH	34	cor	0.71885	0.730024
	GBLUP_GAFwt	HJ	bullsNcows	valH	34	reg	0.91536	0.849461
	GBLUP_GFwt	HJ	bullsOnly	valH	35	cor	0.778351	0.778351
	GBLUP_GFwt	HJ	bullsOnly	valH	35	reg	0.921936	0.921936
	GBLUP_GAFwt	HJ	bullsNcows	valH	35	cor	0.823391	0.826286
	GBLUP_GAFwt	HJ	bullsNcows	valH	35	reg	1.00904	0.905375
	BayesRwt	HJ	bullsOnly	valH	1	cor	0.603841	0.622035
	BayesRwt	HJ	bullsOnly	valH	1	reg	1.23667	1.04145
	BayesRwt	HJ	bullsOnly	valH	2	cor	0.579252	0.625747
	BayesRwt	HJ	bullsOnly	valH	2	reg	0.936807	0.832685
	BayesRwt	HJ	bullsOnly	valH	3	cor	0.582445	0.620436
	BayesRwt	HJ	bullsOnly	valH	3	reg	1.04952	0.884522
	BayesRwt	HJ	bullsOnly	valH	22	cor	0.495864	0.501108
	BayesRwt	HJ	bullsOnly	valH	22	reg	0.946486	0.814344
	BayesRwt	HJ	bullsOnly	valH	31	cor	0.454303	0.456225
	BayesRwt	HJ	bullsOnly	valH	31	reg	1.32611	1.1264
	BayesRwt	HJ	bullsOnly	valH	32	cor	0.319393	0.318175
	BayesRwt	HJ	bullsOnly	valH	32	reg	1.0024	0.835189
	BayesRwt	HJ	bullsOnly	valH	34	cor	0.788238	0.78896
	BayesRwt	HJ	bullsOnly	valH	34	reg	1.09838	0.993909
	BayesRwt	HJ	bullsOnly	valH	35	cor	0.718755	0.771236
	BayesRwt	HJ	bullsOnly	valH	35	reg	1.13901	0.906409
	BayesRwt	HJ	bullsNcows	valH	1	cor	0.654511	0.667776
	BayesRwt	HJ	bullsNcows	valH	1	reg	1.25074	0.98338
	BayesRwt	HJ	bullsNcows	valH	2	cor	0.633435	0.683092
	BayesRwt	HJ	bullsNcows	valH	2	reg	0.892172	0.783594
	BayesRwt	HJ	bullsNcows	valH	3	cor	0.580195	0.659692
	BayesRwt	HJ	bullsNcows	valH	3	reg	0.99224	0.852827
	BayesRwt	HJ	bullsNcows	valH	22	cor	0.539654	0.54019
	BayesRwt	HJ	bullsNcows	valH	22	reg	0.829622	0.793414
	BayesRwt	HJ	bullsNcows	valH	31	cor	0.441378	0.442008
	BayesRwt	HJ	bullsNcows	valH	31	reg	1.4	1.36811
	BayesRwt	HJ	bullsNcows	valH	32	cor	0.314976	0.312653
	BayesRwt	HJ	bullsNcows	valH	32	reg	1.09198	0.941921
	BayesRwt	HJ	bullsNcows	valH	34	cor	0.810937	0.816628
	BayesRwt	HJ	bullsNcows	valH	34	reg	0.981625	0.895646
	BayesRwt	HJ	bullsNcows	valH	35	cor	0.830447	0.845591
	BayesRwt	HJ	bullsNcows	valH	35	reg	1.00222	0.902449

## Sheet: Table S3
	Table S2. Genomic prediction accuracy and bias for the Jersey validation dataset											Key to Table S2 & Table S3
												Column heading	Labels	Definition
	method	breed	refSet	valSet	trait	type	G	G+A
	GBLUP_AFwt	J	bullsOnly	valJ	1	cor	0.497198	0.497198				method	GBLUP_AFwt	GBLUP with weights, fitting pedigree relationship matrix & fixed effects
	GBLUP_AFwt	J	bullsOnly	valJ	1	reg	0.728677	0.728677				method	GBLUP_AF	GBLUP, fitting pedigree relationship matrix & fixed effects
	GBLUP_AFwt	J	bullsNcows	valJ	1	cor	0.523294	0.523294				method	GBLUP_GAFwt	GBLUP with weights, fitting GRM, pedigree relationship matrix & fixed effects
	GBLUP_AFwt	J	bullsNcows	valJ	1	reg	0.713486	0.713486				method	GBLUP_GFwt	GBLUP with weights, fitting GRM & fixed effects
	GBLUP_AFwt	J	bullsOnly	valJ	2	cor	0.525914	0.525914				method	BayesRwt	BayesR analysis with weights
	GBLUP_AFwt	J	bullsOnly	valJ	2	reg	0.881479	0.881479				breed	H	Holstein (only)
	GBLUP_AFwt	J	bullsNcows	valJ	2	cor	0.531804	0.531804				breed	J	Jersey (only)
	GBLUP_AFwt	J	bullsNcows	valJ	2	reg	0.779663	0.779663				breed	HJ	Holstein and Jersey
	GBLUP_AFwt	J	bullsOnly	valJ	3	cor	0.574964	0.574964				refset	bullsOnly	bulls (only)
	GBLUP_AFwt	J	bullsOnly	valJ	3	reg	0.822511	0.822511				refset	bullsNcows	bulls and cows
	GBLUP_AFwt	J	bullsNcows	valJ	3	cor	0.561238	0.561238				valset	valH	validation in Holstein animals
	GBLUP_AFwt	J	bullsNcows	valJ	3	reg	0.750739	0.750739				valset	valJ	validation in Jersey animals
	GBLUP_AFwt	J	bullsOnly	valJ	22	cor	0.319128	0.319128				trait	1	fat yield
	GBLUP_AFwt	J	bullsOnly	valJ	22	reg	1.10332	1.10332				trait	2	milk yield
	GBLUP_AFwt	J	bullsNcows	valJ	22	cor	0.343418	0.343418				trait	3	protein yield
	GBLUP_AFwt	J	bullsNcows	valJ	22	reg	0.87631	0.87631				trait	22	stature
	GBLUP_AFwt	J	bullsOnly	valJ	31	cor	0.207566	0.207566				trait	31	fertility (calving interval)
	GBLUP_AFwt	J	bullsOnly	valJ	31	reg	1.38819	1.38819				trait	32	survival
	GBLUP_AFwt	J	bullsNcows	valJ	31	cor	0.229823	0.229823				trait	34	fat% in milk
	GBLUP_AFwt	J	bullsNcows	valJ	31	reg	1.58388	1.58388				trait	35	protein% in milk
	GBLUP_AFwt	J	bullsOnly	valJ	32	cor	0.132038	0.132038				type	cor	correlation
	GBLUP_AFwt	J	bullsOnly	valJ	32	reg	0.517304	0.517304				type	reg	regression
	GBLUP_AFwt	J	bullsNcows	valJ	32	cor	0.11835	0.11835
	GBLUP_AFwt	J	bullsNcows	valJ	32	reg	0.479098	0.479098				where column heading are defined as:
	GBLUP_AF	J	bullsOnly	valJ	34	cor	0.537719	0.537719				method = method used for prediction
	GBLUP_AF	J	bullsOnly	valJ	34	reg	0.924543	0.924543				breed = breed composition of reference dataset
	GBLUP_AF	J	bullsNcows	valJ	34	cor	0.605508	0.605508				refset = gender composition of reference dataset (bulls only or bulls and cows)
	GBLUP_AF	J	bullsNcows	valJ	34	reg	0.846767	0.846767				valset = validation dataset where accuracy and bias calculations are made
	GBLUP_AFwt	J	bullsNcows	valJ	35	cor	0.625389	0.625389				trait = trait analysed
	GBLUP_AFwt	J	bullsNcows	valJ	35	reg	0.843819	0.843819				type = either calculation of the correlation (accuracy) or regression (bias)
	GBLUP_GAFwt	J	bullsOnly	valJ	1	cor	0.567925	0.564401				G = predictions for the validation dataset using GEBV only
	GBLUP_GAFwt	J	bullsOnly	valJ	1	reg	0.832341	0.775352				G + A = predictions for the validation using GEBV and pedigree predictions
	GBLUP_GAFwt	J	bullsNcows	valJ	1	cor	0.556354	0.571955
	GBLUP_GAFwt	J	bullsNcows	valJ	1	reg	0.883006	0.692907
	GBLUP_GAFwt	J	bullsOnly	valJ	2	cor	0.588879	0.589334
	GBLUP_GAFwt	J	bullsOnly	valJ	2	reg	1.03847	0.912026
	GBLUP_GAFwt	J	bullsNcows	valJ	2	cor	0.622544	0.619724
	GBLUP_GAFwt	J	bullsNcows	valJ	2	reg	0.931818	0.770064
	GBLUP_GAFwt	J	bullsOnly	valJ	3	cor	0.653079	0.645403
	GBLUP_GAFwt	J	bullsOnly	valJ	3	reg	1.06611	0.919402
	GBLUP_GAFwt	J	bullsNcows	valJ	3	cor	0.671909	0.66253
	GBLUP_GAFwt	J	bullsNcows	valJ	3	reg	1.20047	0.840806
	GBLUP_GAFwt	J	bullsOnly	valJ	22	cor	0.326553	0.326553
	GBLUP_GAFwt	J	bullsOnly	valJ	22	reg	0.937704	0.937704
	GBLUP_GAFwt	J	bullsNcows	valJ	22	cor	0.41837	0.433087
	GBLUP_GAFwt	J	bullsNcows	valJ	22	reg	1.02868	0.937832
	GBLUP_GAFwt	J	bullsOnly	valJ	31	cor	0.142389	0.155722
	GBLUP_GAFwt	J	bullsOnly	valJ	31	reg	1.1887	1.02693
	GBLUP_GAFwt	J	bullsNcows	valJ	31	cor	0.244344	0.244344
	GBLUP_GAFwt	J	bullsNcows	valJ	31	reg	1.37408	1.37407
	GBLUP_GAFwt	J	bullsOnly	valJ	32	cor	0.143975	0.166077
	GBLUP_GAFwt	J	bullsOnly	valJ	32	reg	0.689442	0.725767
	GBLUP_GAFwt	J	bullsNcows	valJ	32	cor	0.0574427	0.113625
	GBLUP_GAFwt	J	bullsNcows	valJ	32	reg	0.320928	0.482999
	GBLUP_GAFwt	J	bullsOnly	valJ	34	cor	0.530335	0.545223
	GBLUP_GAFwt	J	bullsOnly	valJ	34	reg	0.905298	0.776758
	GBLUP_GAFwt	J	bullsNcows	valJ	34	cor	0.627744	0.659357
	GBLUP_GAFwt	J	bullsNcows	valJ	34	reg	0.827432	0.716831
	GBLUP_GFwt	J	bullsOnly	valJ	35	cor	0.728439	0.728439
	GBLUP_GFwt	J	bullsOnly	valJ	35	reg	1.03137	1.03137
	GBLUP_GAFwt	J	bullsNcows	valJ	35	cor	0.751774	0.770244
	GBLUP_GAFwt	J	bullsNcows	valJ	35	reg	0.88292	0.798472
	BayesRwt	J	bullsOnly	valJ	1	cor	0.57235	0.570769
	BayesRwt	J	bullsOnly	valJ	1	reg	0.839593	0.794224
	BayesRwt	J	bullsNcows	valJ	1	cor	0.560333	0.571608
	BayesRwt	J	bullsNcows	valJ	1	reg	0.887151	0.703815
	BayesRwt	J	bullsOnly	valJ	2	cor	0.653364	0.655466
	BayesRwt	J	bullsOnly	valJ	2	reg	1.06649	0.982858
	BayesRwt	J	bullsNcows	valJ	2	cor	0.699777	0.692486
	BayesRwt	J	bullsNcows	valJ	2	reg	0.9828	0.834539
	BayesRwt	J	bullsOnly	valJ	3	cor	0.678811	0.671713
	BayesRwt	J	bullsOnly	valJ	3	reg	1.09863	0.962238
	BayesRwt	J	bullsNcows	valJ	3	cor	0.717622	0.701584
	BayesRwt	J	bullsNcows	valJ	3	reg	1.24277	0.892775
	BayesRwt	J	bullsOnly	valJ	22	cor	0.321609	0.328425
	BayesRwt	J	bullsOnly	valJ	22	reg	0.979346	0.920884
	BayesRwt	J	bullsNcows	valJ	22	cor	0.386804	0.407107
	BayesRwt	J	bullsNcows	valJ	22	reg	0.887788	0.845338
	BayesRwt	J	bullsOnly	valJ	31	cor	0.155155	0.162943
	BayesRwt	J	bullsOnly	valJ	31	reg	1.05617	0.948171
	BayesRwt	J	bullsNcows	valJ	31	cor	0.276558	0.273266
	BayesRwt	J	bullsNcows	valJ	31	reg	1.75211	1.57749
	BayesRwt	J	bullsOnly	valJ	32	cor	0.136172	0.161013
	BayesRwt	J	bullsOnly	valJ	32	reg	0.625838	0.672199
	BayesRwt	J	bullsNcows	valJ	32	cor	0.0550682	0.121315
	BayesRwt	J	bullsNcows	valJ	32	reg	0.312766	0.522495
	BayesRwt	J	bullsOnly	valJ	34	cor	0.706426	0.715295
	BayesRwt	J	bullsOnly	valJ	34	reg	0.9237	0.898103
	BayesRwt	J	bullsNcows	valJ	34	cor	0.769435	0.790117
	BayesRwt	J	bullsNcows	valJ	34	reg	0.893196	0.814184
	BayesRwt	J	bullsOnly	valJ	35	cor	0.753114	0.769344
	BayesRwt	J	bullsOnly	valJ	35	reg	1.04569	0.974911
	BayesRwt	J	bullsNcows	valJ	35	cor	0.794358	0.809697
	BayesRwt	J	bullsNcows	valJ	35	reg	0.917337	0.821009
	GBLUP_AFwt	HJ	bullsOnly	valJ	1	cor	0.498075	0.498075
	GBLUP_AFwt	HJ	bullsOnly	valJ	1	reg	0.744768	0.744768
	GBLUP_AFwt	HJ	bullsNcows	valJ	1	cor	0.525691	0.525691
	GBLUP_AFwt	HJ	bullsNcows	valJ	1	reg	0.727388	0.727388
	GBLUP_AFwt	HJ	bullsOnly	valJ	2	cor	0.526762	0.526762
	GBLUP_AFwt	HJ	bullsOnly	valJ	2	reg	0.911189	0.911189
	GBLUP_AFwt	HJ	bullsNcows	valJ	2	cor	0.53353	0.53353
	GBLUP_AFwt	HJ	bullsNcows	valJ	2	reg	0.79104	0.79104
	GBLUP_AFwt	HJ	bullsOnly	valJ	3	cor	0.575046	0.575046
	GBLUP_AFwt	HJ	bullsOnly	valJ	3	reg	0.830976	0.830976
	GBLUP_AFwt	HJ	bullsNcows	valJ	3	cor	0.563778	0.563778
	GBLUP_AFwt	HJ	bullsNcows	valJ	3	reg	0.759878	0.759878
	GBLUP_AFwt	HJ	bullsOnly	valJ	22	cor	0.31579	0.31579
	GBLUP_AFwt	HJ	bullsOnly	valJ	22	reg	0.984166	0.984166
	GBLUP_AFwt	HJ	bullsNcows	valJ	22	cor	0.340195	0.340195
	GBLUP_AFwt	HJ	bullsNcows	valJ	22	reg	0.922423	0.922423
	GBLUP_AFwt	HJ	bullsOnly	valJ	31	cor	0.214835	0.214835
	GBLUP_AFwt	HJ	bullsOnly	valJ	31	reg	1.28162	1.28162
	GBLUP_AFwt	HJ	bullsNcows	valJ	31	cor	0.228459	0.228459
	GBLUP_AFwt	HJ	bullsNcows	valJ	31	reg	1.14162	1.14162
	GBLUP_AFwt	HJ	bullsOnly	valJ	32	cor	0.132008	0.132008
	GBLUP_AFwt	HJ	bullsOnly	valJ	32	reg	0.516913	0.516913
	GBLUP_AFwt	HJ	bullsNcows	valJ	32	cor	0.118773	0.118773
	GBLUP_AFwt	HJ	bullsNcows	valJ	32	reg	0.509191	0.509191
	GBLUP_AFwt	HJ	bullsOnly	valJ	34	cor	0.546153	0.546153
	GBLUP_AFwt	HJ	bullsOnly	valJ	34	reg	0.919016	0.919016
	GBLUP_AFwt	HJ	bullsNcows	valJ	34	cor	0.606813	0.606813
	GBLUP_AFwt	HJ	bullsNcows	valJ	34	reg	0.888563	0.888563
	GBLUP_AF	HJ	bullsOnly	valJ	35	cor	0.645474	0.645474
	GBLUP_AF	HJ	bullsOnly	valJ	35	reg	1.11432	1.11432
	GBLUP_AFwt	HJ	bullsNcows	valJ	35	cor	0.626495	0.626495
	GBLUP_AFwt	HJ	bullsNcows	valJ	35	reg	0.84837	0.84837
	GBLUP_GAFwt	HJ	bullsOnly	valJ	1	cor	0.571948	0.57061
	GBLUP_GAFwt	HJ	bullsOnly	valJ	1	reg	0.911765	0.798219
	GBLUP_GAFwt	HJ	bullsNcows	valJ	1	cor	0.579991	0.587547
	GBLUP_GAFwt	HJ	bullsNcows	valJ	1	reg	0.884041	0.701426
	GBLUP_GAFwt	HJ	bullsOnly	valJ	2	cor	0.589623	0.590476
	GBLUP_GAFwt	HJ	bullsOnly	valJ	2	reg	1.07702	0.921133
	GBLUP_GAFwt	HJ	bullsNcows	valJ	2	cor	0.639705	0.639136
	GBLUP_GAFwt	HJ	bullsNcows	valJ	2	reg	0.914544	0.781075
	GBLUP_GAFwt	HJ	bullsOnly	valJ	3	cor	0.66657	0.656405
	GBLUP_GAFwt	HJ	bullsOnly	valJ	3	reg	1.1855	0.944025
	GBLUP_GAFwt	HJ	bullsNcows	valJ	3	cor	0.686383	0.677453
	GBLUP_GAFwt	HJ	bullsNcows	valJ	3	reg	1.16798	0.851322
	GBLUP_GAFwt	HJ	bullsOnly	valJ	22	cor	0.368248	0.369946
	GBLUP_GAFwt	HJ	bullsOnly	valJ	22	reg	1.12514	0.964572
	GBLUP_GAFwt	HJ	bullsNcows	valJ	22	cor	0.437102	0.439656
	GBLUP_GAFwt	HJ	bullsNcows	valJ	22	reg	0.971147	0.928471
	GBLUP_GAFwt	HJ	bullsOnly	valJ	31	cor	0.0293076	0.037213
	GBLUP_GAFwt	HJ	bullsOnly	valJ	31	reg	0.161744	0.197602
	GBLUP_GAFwt	HJ	bullsNcows	valJ	31	cor	0.237343	0.237343
	GBLUP_GAFwt	HJ	bullsNcows	valJ	31	reg	1.00873	1.00872
	GBLUP_GAFwt	HJ	bullsOnly	valJ	32	cor	0.120662	0.160677
	GBLUP_GAFwt	HJ	bullsOnly	valJ	32	reg	0.619821	0.701683
	GBLUP_GAFwt	HJ	bullsNcows	valJ	32	cor	0.0590985	0.0993146
	GBLUP_GAFwt	HJ	bullsNcows	valJ	32	reg	0.30107	0.439476
	GBLUP_GAFwt	HJ	bullsOnly	valJ	34	cor	0.529821	0.54156
	GBLUP_GAFwt	HJ	bullsOnly	valJ	34	reg	0.849535	0.76516
	GBLUP_GAFwt	HJ	bullsNcows	valJ	34	cor	0.662091	0.677192
	GBLUP_GAFwt	HJ	bullsNcows	valJ	34	reg	0.817181	0.741825
	GBLUP_GFwt	HJ	bullsOnly	valJ	35	cor	0.734965	0.734965
	GBLUP_GFwt	HJ	bullsOnly	valJ	35	reg	1.01634	1.01634
	GBLUP_GAFwt	HJ	bullsNcows	valJ	35	cor	0.771643	0.784689
	GBLUP_GAFwt	HJ	bullsNcows	valJ	35	reg	0.902392	0.815678
	BayesRwt	HJ	bullsOnly	valJ	1	cor	0.574373	0.579926
	BayesRwt	HJ	bullsOnly	valJ	1	reg	0.915775	0.802347
	BayesRwt	HJ	bullsOnly	valJ	2	cor	0.630814	0.64608
	BayesRwt	HJ	bullsOnly	valJ	2	reg	1.02566	0.917595
	BayesRwt	HJ	bullsOnly	valJ	3	cor	0.68812	0.690493
	BayesRwt	HJ	bullsOnly	valJ	3	reg	1.1623	0.9643
	BayesRwt	HJ	bullsOnly	valJ	22	cor	0.360791	0.363411
	BayesRwt	HJ	bullsOnly	valJ	22	reg	1.02175	0.898267
	BayesRwt	HJ	bullsOnly	valJ	31	cor	0.0171986	0.0476712
	BayesRwt	HJ	bullsOnly	valJ	31	reg	0.106304	0.256759
	BayesRwt	HJ	bullsOnly	valJ	32	cor	0.127814	0.170438
	BayesRwt	HJ	bullsOnly	valJ	32	reg	0.674286	0.744508
	BayesRwt	HJ	bullsOnly	valJ	34	cor	0.685707	0.702455
	BayesRwt	HJ	bullsOnly	valJ	34	reg	0.956898	0.906718
	BayesRwt	HJ	bullsOnly	valJ	35	cor	0.682159	0.734686
	BayesRwt	HJ	bullsOnly	valJ	35	reg	1.12537	0.990399
	BayesRwt	HJ	bullsNcows	valJ	1	cor	0.558935	0.585355
	BayesRwt	HJ	bullsNcows	valJ	1	reg	0.926065	0.720839
	BayesRwt	HJ	bullsNcows	valJ	2	cor	0.68979	0.710236
	BayesRwt	HJ	bullsNcows	valJ	2	reg	0.948053	0.833055
	BayesRwt	HJ	bullsNcows	valJ	3	cor	0.714591	0.723119
	BayesRwt	HJ	bullsNcows	valJ	3	reg	1.18107	0.900324
	BayesRwt	HJ	bullsNcows	valJ	22	cor	0.424869	0.427149
	BayesRwt	HJ	bullsNcows	valJ	22	reg	0.910012	0.861843
	BayesRwt	HJ	bullsNcows	valJ	31	cor	0.245403	0.24482
	BayesRwt	HJ	bullsNcows	valJ	31	reg	1.06866	1.04056
	BayesRwt	HJ	bullsNcows	valJ	32	cor	0.0705645	0.125613
	BayesRwt	HJ	bullsNcows	valJ	32	reg	0.393352	0.570131
	BayesRwt	HJ	bullsNcows	valJ	34	cor	0.76084	0.7829
	BayesRwt	HJ	bullsNcows	valJ	34	reg	0.918796	0.847109
	BayesRwt	HJ	bullsNcows	valJ	35	cor	0.788071	0.809244
	BayesRwt	HJ	bullsNcows	valJ	35	reg	0.866529	0.796138

## Sheet: Table S4
	Table S4. Across-breed prediction accuracy for Australian Red animals
	Reference dataset	Prediction method	Validation dataset	FY		MY		PY		F%		P%
				Acc.	Bias	Acc.	Bias	Acc.	Bias	Acc.	Bias	Acc.	Bias
	Holstein	GBLUP	AustRbulls	0.15	0.66	0.13	0.39	0.06	0.23	0.3	0.83	0.38	1.13
	Holstein	GBLUP	AustRcows	0.04	0.18	0.07	0.14	-0.07	-0.24	0.52	1.05	0.57	1.37
	Holstein	BayesR	AustRbulls	0.23	0.75	0.25	0.76	0.11	0.48	0.42	0.92	0.36	0.7
	Holstein	BayesR	AustRcows	0.16	0.59	0.13	0.29	-0.04	-0.15	0.61	0.92	0.52	0.87
	Jersey	GBLUP	AustRbulls	0.07	0.53	0.05	0.31	0.1	0.87	0.09	0.34	0.03	0.1
	Jersey	GBLUP	AustRcows	0.2	1.48	-0.03	-0.17	0.11	0.88	0.3	0.87	0.34	0.88
	Jersey	BayesR	AustRbulls	0.18	0.88	0.1	0.4	0.14	0.96	0.4	0.64	0.14	0.24
	Jersey	BayesR	AustRcows	0.51	2.31	0.05	0.16	0.23	1.27	0.42	0.54	0.28	0.41
	Hol/Jer	GBLUP	AustRbulls	0.2	0.86	0.16	0.52	0.11	0.49	0.32	0.9	0.34	0.97
	Hol/Jer	GBLUP	AustRcows	0.14	0.64	0.05	0.12	-0.04	-0.17	0.59	1.21	0.61	1.36
	Hol/Jer	BayesR	AustRbulls	0.26	0.84	0.21	0.61	0.13	0.51	0.44	0.89	0.36	0.62
	Hol/Jer	BayesR	AustRcows	0.25	0.94	0.23	0.5	0.06	0.25	0.61	0.86	0.49	0.71
	Traits are: FY = fat yield (kg/lactation), MY = milk yield (L/lactation), PY = protein yield (kg/lactation), F% = fat percentage (%) & P% = protein percentage in milk (%).
	Acc. = accuracy, measured as r(y ̂,y), where y ̂ is the prediction of genetic merit. Bias = bias of the prediction, measured as the regression coefficient, b(y ̂,y)
	Reference dataset = bull and cow reference dataset used for prediction, either single or combined breed populations.
	Prediction method = method of prediction
	Validation dataset = either Australian Red bull or cow validation datasets.
	Standard errors of the estimates are approximately:
		(1)	0.0636285	for AustRcows
		(2)	0.0936586	for AustRbulls

## Sheet: Table S5
	Table S5. Details of genes identified from the mammary expression data and listed in Table 6.
	Ensembl gene ID	Gene name	BTA	Gene start (bp)	Gene end (bp)	Description
	ENSBTAG00000021286	SLC37A1	1	144364346	144437225	solute carrier family 37 (glucose-6-phosphate transporter), member 1 [Source:HGNC Symbol;Acc:11024]
	ENSBTAG00000017104	MUC1	3	15482856	15486936	Bos taurus mucin 1, cell surface associated (MUC1), mRNA. [Source:RefSeq mRNA;Acc:NM_174115]
	ENSBTAG00000001136	KIAA1324	3	34313872	34353121	KIAA1324 [Source:HGNC Symbol;Acc:29618]
	ENSBTAG00000005859	LALBA	5	31347861	31349882	Bos taurus lactalbumin, alpha- (LALBA), mRNA. [Source:RefSeq mRNA;Acc:NM_174378]
	ENSBTAG00000038652		5	74935713	74959662	Bos taurus apolipoprotein L, 3-like (LOC510193), mRNA. [Source:RefSeq mRNA;Acc:NM_001100333]
	ENSBTAG00000009064	CSF2RB	5	75724620	75745819	colony stimulating factor 2 receptor, beta, low-affinity (granulocyte-macrophage) [Source:HGNC Symbol;Acc:2436]
	ENSBTAG00000013333	GYS2	5	89020801	89077024	glycogen synthase 2 (liver) [Source:HGNC Symbol;Acc:4707]
	ENSBTAG00000008541	MGST1	5	93926791	93950162	microsomal glutathione S-transferase 1 [Source:HGNC Symbol;Acc:7061]
	ENSBTAG00000017704	ABCG2	6	37913110	38030583	Bos taurus ATP-binding cassette, sub-family G (WHITE), member 2 (ABCG2), mRNA. [Source:RefSeq mRNA;Acc:NM_001037478]
	ENSBTAG00000005005	CSN1S2	6	87262457	87280936	Bos taurus casein alpha-S2 (CSN1S2), mRNA. [Source:RefSeq mRNA;Acc:NM_174528]
	ENSBTAG00000013718	GC	6	88695940	88739180	group-specific component (vitamin D binding protein) [Source:HGNC Symbol;Acc:4187]
	ENSBTAG00000015580	TLE3	10	16901655	16949714	transducin-like enhancer of split 3 (E(sp1) homolog, Drosophila) [Source:HGNC Symbol;Acc:11839]
	ENSBTAG00000014678	LGB	11	103301664	103306381	Bos taurus progestagen-associated endometrial protein (PAEP), mRNA. [Source:RefSeq mRNA;Acc:NM_173929]
	ENSBTAG00000012525		11	104232297	104251043	Bos taurus ABO blood group (transferase A, alpha 1-3-N-acetylgalactosaminyltransferase; transferase B, alpha 1-3-galactosyltransferase) (ABO), mRNA. [Source:RefSeq mRNA;Acc:NM_001077926]
	ENSBTAG00000032603	ABCC4	12	70024624	70171520	ATP-binding cassette, sub-family C (CFTR/MRP), member 4 [Source:HGNC Symbol;Acc:55]
	ENSBTAG00000045751		12	72065148	72204484	Uncharacterized protein [Source:UniProtKB/TrEMBL;Acc:G3MW12]
	ENSBTAG00000014357	SDC2	14	69930853	70050653	Bos taurus syndecan 2 (SDC2), mRNA. [Source:RefSeq mRNA;Acc:NM_001034788]
	ENSBTAG00000005343	TPH1	15	34990951	35011243	tryptophan hydroxylase 1 [Source:HGNC Symbol;Acc:12008]
	ENSBTAG00000019062	FCHSD2	15	53161555	53404313	FCH and double SH3 domains 2 [Source:HGNC Symbol;Acc:29114]
	ENSBTAG00000010169	SUCO	16	40904879	40973025	SUN domain containing ossification factor [Source:HGNC Symbol;Acc:1240]
	ENSBTAG00000009496	STAT5A	19	43033597	43054075	Bos taurus signal transducer and activator of transcription 5A (STAT5A), mRNA. [Source:RefSeq mRNA;Acc:NM_001012673]
	ENSBTAG00000015980	FASN	19	51384922	51403614	fatty acid synthase [Source:HGNC Symbol;Acc:3594]
	ENSBTAG00000024903	KCNJ16	19	61226690	61229571	Bos taurus potassium inwardly-rectifying channel, subfamily J, member 16 (KCNJ16), mRNA. [Source:RefSeq mRNA;Acc:NM_001076294]
	ENSBTAG00000001557	CCL28	20	31391483	31409955	Bos taurus chemokine (C-C motif) ligand 28 (CCL28), mRNA. [Source:RefSeq mRNA;Acc:NM_001101163]
	ENSBTAG00000013391	ANKH	20	58376939	58546811	Bos taurus ankylosis, progressive homolog (mouse) (ANKH), mRNA. [Source:RefSeq mRNA;Acc:NM_001109793]
	ENSBTAG00000019217	KIF13A	23	39404303	39501810	kinesin family member 13A [Source:HGNC Symbol;Acc:14566]
	ENSBTAG00000012058	GMDS	23	51117008	51453402	Bos taurus GDP-mannose 4,6-dehydratase (GMDS), mRNA. [Source:RefSeq mRNA;Acc:NM_001080331]
	ENSBTAG00000045728	SCD	26	21141592	21148318	Bos taurus stearoyl-CoA desaturase (delta-9-desaturase) (SCD), mRNA. [Source:RefSeq mRNA;Acc:NM_173959]
	ENSBTAG00000005730	AGPAT6	27	36212255	36229009	Bos taurus 1-acylglycerol-3-phosphate O-acyltransferase 6 (lysophosphatidic acid acyltransferase, zeta) (AGPAT6), mRNA. [Source:RefSeq mRNA;Acc:NM_001083669]
	ENSBTAG00000013240	SLC3A2	29	41855871	41896760	Bos taurus solute carrier family 3 (activators of dibasic and neutral amino acid transport), member 2 (SLC3A2), mRNA. [Source:RefSeq mRNA;Acc:NM_001024488]
