# Supplementary material for: Improved precision of QTL mapping using a nonlinear Bayesian method in a multi-breed population leads to greater accuracy of across-breed genomic predictions
Source: Springer Nature journal article supplement (doi:10.1186/s12711-014-0074-4), 2015-04-16
Supplement: MOESM2 [file 12711_2014_74_MOESM2_ESM.pdf]

## Additional file 2

### Derivation of the full conditional likelihood function

The likelihood that marker  $j$  is from distribution  $k$  is

$$L(v_{j,k}|\sigma_k^2) = -0.5[\ln(2\pi) + \ln(|\mathbf{V}|) + \mathbf{y}_j^*'\mathbf{V}^{-1}\mathbf{y}_j^*]$$

where  $\mathbf{V}$  is the (residual) phenotypic variance-covariance matrix and  $\mathbf{y}_j^*'\mathbf{V}^{-1}\mathbf{y}_j^*$  simplifies to  $\mathbf{y}_j^*'\mathbf{R}^{-1}\mathbf{y}_j^* - \mathbf{y}_j^*'\mathbf{R}^{-1}\mathbf{W}_j\mathbf{v}_{j,k}$  (i.e. where  $v_{j,k} = [\mathbf{W}_j'\mathbf{R}^{-1}\mathbf{W}_j + \sigma_k^{-2}]^{-1}\mathbf{W}_j'\mathbf{R}^{-1}\mathbf{y}_j^*$ , following eq. [vi] in the main paper). Since  $\mathbf{V} = \mathbf{W}_j\mathbf{W}_j'\sigma_k^2 + \mathbf{R}$ , then using Sylvester's theorem  $\ln(|\mathbf{V}|) = \ln(|\mathbf{R}|) + \ln(|\mathbf{I} + \mathbf{W}_j'\mathbf{R}^{-1}\mathbf{W}_j\sigma_k^2|)$  (see PART A below) and because  $\ln(|\mathbf{R}|)$  is constant over any  $\sigma_k^2$ , then the inverse phenotypic variance-covariance matrix is  $\mathbf{V}^{-1} = \mathbf{R}^{-1} - \mathbf{R}^{-1}\mathbf{W}_j[\mathbf{W}_j'\mathbf{R}^{-1}\mathbf{W}_j + \sigma_k^{-2}]^{-1}\mathbf{W}_j'\mathbf{R}^{-1}$  (see PART B for proof of  $\mathbf{V}\mathbf{V}^{-1} = \mathbf{I}$ ). Hence the full conditional likelihood is:

$$L(v_{j,k}|\sigma_k^2) = -0.5[\ln(1 + \mathbf{W}_j'\mathbf{R}^{-1}\mathbf{W}_j\sigma_k^2) + \mathbf{y}_j^*'\mathbf{R}^{-1}\mathbf{y}_j^* - \mathbf{y}_j^*'\mathbf{R}^{-1}\mathbf{W}_j\mathbf{v}_{j,k}] + \ln(pr_k),$$

where  $pr_k$  is the current estimate for the proportion of markers from distribution  $k$ .

PART A:

Sylvester's theorem states that:

$$|\mathbf{I}_n + \mathbf{AB}| = |\mathbf{I}_m + \mathbf{BA}|$$

where  $\mathbf{I}_n$  is an  $n$  by  $n$  identity matrix,  $\mathbf{A}$  is an  $n$  by  $m$  matrix and  $\mathbf{B}$  is a  $m$  by  $n$  matrix. By extension, if  $\mathbf{X}$  is a  $n$  by  $n$  square matrix then

$$\begin{aligned} |\mathbf{X} + \mathbf{AB}| &= |\mathbf{X}||\mathbf{I}_n + \mathbf{X}^{-1}\mathbf{AB}| \\ &= |\mathbf{X}||\mathbf{I}_m + \mathbf{BX}^{-1}\mathbf{A}| \end{aligned}$$

Similarly, if

$$\begin{aligned} |\mathbf{V}| &= |\mathbf{W}\mathbf{W}'\sigma_k^2 + \mathbf{R}| \\ &= |\mathbf{R}||\mathbf{I} + \mathbf{R}^{-1}\mathbf{W}\mathbf{W}'\sigma_k^2| \\ &= |\mathbf{R}||\mathbf{I} + \mathbf{W}'\mathbf{R}^{-1}\mathbf{W}\sigma_k^2| \end{aligned}$$

PART B:

Proof that  $\mathbf{V}\mathbf{V}^{-1} = \mathbf{I}$  [following 27]:

Let

$$\mathbf{Q} = [\mathbf{W}'_j\mathbf{R}^{-1}\mathbf{W}_j + \sigma_k^{-2}]^{-1}$$

$\mathbf{V}\mathbf{V}^{-1}$

$$\begin{aligned} &= [\mathbf{R} + \mathbf{W}_j\mathbf{W}'_j\sigma_k^2] [\mathbf{R}^{-1} + \mathbf{R}^{-1}\mathbf{W}_j\mathbf{Q}\mathbf{W}'_j\mathbf{R}^{-1}] \\ &= \mathbf{I} + \mathbf{W}_j\mathbf{W}'_j\mathbf{R}^{-1}\sigma_k^2 - \mathbf{W}_j\mathbf{Q}\mathbf{W}'_j\mathbf{R}^{-1} - \mathbf{W}_j\mathbf{W}'_j\mathbf{R}^{-1}\mathbf{W}_j\mathbf{Q}\mathbf{W}'_j\mathbf{R}^{-1}\sigma_k^2 \\ &= \mathbf{I} + \mathbf{W}_j\mathbf{W}'_j\mathbf{R}^{-1}\sigma_k^2 - \mathbf{W}_j[\mathbf{I} + \mathbf{W}'_j\mathbf{R}^{-1}\mathbf{W}_j\sigma_k^2]\mathbf{Q}\mathbf{W}'_j\mathbf{R}^{-1} \\ &= \mathbf{I} + \mathbf{W}_j\mathbf{W}'_j\mathbf{R}^{-1}\sigma_k^2 - \mathbf{W}_j\sigma_k^2[\sigma_k^{-2} + \mathbf{W}'_j\mathbf{R}^{-1}\mathbf{W}_j]\mathbf{Q}\mathbf{W}'_j\mathbf{R}^{-1} \\ &= \mathbf{I} + \mathbf{W}_j\mathbf{W}'_j\mathbf{R}^{-1}\sigma_k^2 - \mathbf{W}_j\mathbf{Q}^{-1}\mathbf{Q}\mathbf{W}'_j\mathbf{R}^{-1} \\ &= \mathbf{I} \end{aligned}$$
